# Supplementary material
Source: Research Square preprint supplement (doi:10.21203/rs.3.rs-9128384/v1)
Supplement: Supplementary file 1 [file e9e1c700ad3d77976afad7b4.docx]

**Supplementary Table 1: Clinical characteristics of TDT vs NTDT**

| **Variables** |  | **TDT (n, %)** | **NTDT (n, %)** | **X2** | **P value*** |
| --- | --- | --- | --- | --- | --- |
| **Gender** | Male | 45 (88.24%) | 6 (11.76%) | 2.13 | 0.14 |
| Female | 43 (75.44%) | 14 (24.56%) |
| **Obesity** | Non-obese | 70 (85.37%) | 12 (14.12%) | 3.64 | 0.16 |
| Obese | 17 (70.83%) | 7 (29.17%) |
| **Smoking** | Active smoker | 12 (92.31%) | 1(7.96%) | 4.26 | 0.12 |
| Passive smoker | 24(70.59%) | 10(29.41%) |
| Non-smoker | 52(85.25%) | 9(14.75%) |
| **Liver hemochromatosis** | No | 61 (80.26%) | 15 (19.74%) | 0.053 | 0.82 |
| Yes | 27 (84.38%) | 5 (15.63%) |
| **Cardiac hemochromatosis** | No | 85 (80.95%) | 20 (19.05%) | 0.007 | 0.93 |
| Yes | 3 (100%) | 0 |
| **Number of ICT** | 0 | 3 (33.33%) | 6 (66.67%) | 16.51 | **0.001** |
| 1 | 46 (82.14%) | 10 (17.86%) |
| 2 | 26 (92.86%) | 2 (7.14%) |
| 3 | 13 (86.67%) | 2 (13.33%) |
| **Cardiac complications** | No | 41 (73.21%) | 15 (26.79%) | 4.19 | **0.04** |
| Yes | 47 (90.38%) | 5 (9.61%) |
| **Cardiomyopathy** | No | 64 (78.05%) | 18 (21.95%) | 1.80 | 0.18 |
| Yes | 24 (92.31%) | 2 (7.69%) |
| **Valvular affection** | No | 42 (72.41%) | 16 (27.59%) | 5.59 | **0.02** |
| Yes | 46 (92%) | 4 (8%) |
| **Hypertension** | No | 85 (80.95%) | 20 (19.05%) | 0.007 | 0.93 |
| Yes | 3 (100%) | 0 |
| **DM** | No | 83 (80.58%) | 20 (19.42%) | 0.25 | 0.62 |
| Yes | 5 (100%) | 0 |
| **HCV** | Negative | 25 (64.10%) | 14 (35.90%) | 10.39 | **0.001** |
| Positive | 57 (91.94%) | 5 (8.06%) |
| **Hepatomegaly** | No | 36 (76.60%) | 11 (23.40%) | 0.81 | 0.37 |
| Yes | 52 (85.25%) | 9 (14.75%) |
| **Chronic liver disease** | No | 33 (68.75%) | 15 (31.25%) | 7.82 | **0.005** |
| Yes | 55 (91.67%) | 5 (8.33%) |
| **Splenomegaly** | No | 3 (25%) | 9 (75%) | 24.49 | **<0.0001** |
| Yes | 85 (88.54%) | 11 (11.46%) |
| **Splenectomy** | No | 20 (64.52%) | 11 (35.48%) | 9.79 | **0.001** |
| Yes | 68 (88.31%) | 9 (11.69%) |
| **GB stones** | No | 54 (79.41%) | 14 (20.59%) | 0.22 | 0.64 |
| Yes | 34 (85%) | 6 (15%) |
| **Skin ulcers** | No | 82 (80.39%) | 20 (19.61%) | 0.44 | 0.51 |
| Yes | 6 (100%) | 0 |
| **Pulmonary HTN** | No | 84 (80.77%) | 20 (19.23%) | 0.1 | 0.75 |
| Yes | 4 (100%) | 0 |
| **Endocrinopathy** | No | 82 (80.39%) | 20 (19.61%) | 0.44 | 0.51 |
| Yes | 6 (100%) | 0 |
| **Osteoporosis** | No | 78 (80.41%) | 19 (19.59%) | 0.19 | 0.66 |
| Yes | 10 (90.91%) | 1 (9.10%) |
| **Renal insufficiency** | No | 78 (80.41%) | 19 (19.59%) | 0.19 | 0.66 |
| Yes | 10 (90.91%) | 1 (9.10%) |

*NTDT: Non-transfusion dependent thalassemia, TDT: Transfusion dependent thalassemia, ICT: Iron chelators, DM: Diabetes Mellitus, HCV: Hepatitis C virus, GB: Gallbladder, HTN: Hypertension, n: number, X2 : Value of Pearson Chi-Square test, bold value indicates significant p-value

**Supplementary Table 2: Laboratory characteristics of TDT vs NTDT**

| **Values** |  | **Mean** | **SD** | **Median** | **Range** | **P-value*** |
| --- | --- | --- | --- | --- | --- | --- |
| **TLC (×10³/µL )** | TDT | 25.91 | 27.69 | 16.40 | 3.06-157.80 | 0.059 |
| NTDT | 13.10 | 8.43 | 10.52 | 5.25-36.10 |
| **ANC (k/uL)** | TDT | 6.40 | 3.88 | 5.48 | 0.1-21 | 0.84 |
| NTDT | 5.99 | 3.37 | 5.4 | 0.01-13.80 |
| **ALC (k/uL)** | TDT | 15.37 | 22.15 | 7.67 | 0.37-135.30 | 0.083 |
| NTDT | 13.84 | 36.97 | 3.07 | 1.32-169.30 |
| **AMC (k/uL)** | TDT | 1.14 | 1.17 | 0.95 | 0.05-6.87 | 0.46 |
| NTDT | 0.70 | 0.48 | 0.55 | 0.24-2.09 |
| **HB (g/dl)** | TDT | 7.39 | 1.55 | 7.49 | 3.53-12.70 | **0.0012** |
| NTDT | 8.58 | 1.29 | 7.93 | 6.94-11.40 |
| **MCV (fL)** | TDT | 69.81 | 10.64 | 70.5 | 46.9-100.3 | 0.085 |
| NTDT | 66.30 | 10.52 | 65.98 | 45.7-88.9 |
| **MCH (pg)** | TDT | 21.91 | 3.77 | 22.05 | 11.78-29.80 | 0.058 |
| NTDT | 20.69 | 4.45 | 19.63 | 13.3-32.6 |
| **MCHC (g/dL)** | TDT | 31.51 | 2.84 | 31.6 | 22.75-39.70 | 0.35 |
| NTDT | 31.07 | 2.98 | 30.9 | 25.02-37.70 |
| **RDW (%)** | TDT | 27.48 | 7.55 | 26.8 | 12.55-46.10 | **0.0012** |
| NTDT | 21.09 | 6.67 | 19.12 | 13.38-34.10 |
| **PLT (k/uL)** | TDT | 554.48 | 319.97 | 534.5 | 53.73-2126 | 0.68 |
| NTDT | 514.01 | 278.78 | 393.5 | 189-1027 |
| **MPV (fl)** | TDT | 8.54 | 3.67 | 9.58 | 0.54-20.26 | 0.11 |
| NTDT | 10.04 | 2.55 | 10.8 | 6.23-14 |
| **LMR** | TDT | 17.29 | 31.37 | 7.79 | 0.86-172.53 | 0.40 |
| NTDT | 21.09 | 55.73 | 6.45 | 2.40-236.68 |
| **NLR** | TDT | 1.22 | 2.08 | 0.86 | 0.008-18.06 | **0.047** |
| NTDT | 1.49 | 1.04 | 1.28 | 0.001-3.59 |
| **AST (U/L)** | TDT | 58.66 | 37.40 | 48 | 19-249 | 0.34 |
| NTDT | 54.50 | 46 | 43 | 14-218 |
| **ALT (U/L)** | TDT | 44.38 | 38.35 | 33.5 | 5.87-250 | 0.59 |
| NTDT | 80.54 | 130.70 | 35 | 10-582 |
| **Bilirubin (mg/dl)** | TDT | 2.65 | 1.38 | 2.4 | 0.6-8.4 | **0.019** |
| NTDT | 2.04 | 1.55 | 1.51 | 0.4-5.4 |
| **Ferritin before ICT (ng/ml)** | TDT | 2774.51 | 1837.44 | 2000 | 291.5-8108 | 0.059 |
| NTDT | 1892.47 | 1395.78 | 1453 | 10.85-4000 |
| **Ferritin 3-6m after ICT (ng/ml)** | TDT | 2206.36 | 1467.96 | 1855.9 | 116.65-6811 | **0.048** |
| NTDT | 1449.7 | 1121.39 | 1185 | 300-4000 |
| **Ferritin after 1 yr of ICT (ng/ml)** | TDT | 2384.40 | 1461.15 | 2000 | 132-5667 | 0.22 |
| NTDT | 1874.38 | 1254.33 | 1272 | 567.9-4000 |

*NTDT: Non-transfusion dependent thalassemia, TDT: Transfusion dependent thalassemia, TLC: total leucocytic count, ANC: Absolute neutrophilic count, ALC: Absolute lymphocytic count, AMC: Absolute monocytic count, HB: Hemoglobin, MCV; Mean corpuscular volume, MCH; Mean corpuscular hemoglobin, MCHC: Mean corpuscular hemoglobin concentration, RDW: Red cell distribution width, PLT: platelets, MPV; Mean platelet volume, LMR: Lymphocyte-to-Monocyte Ratio, NLR: Neutrophil-to-lymphocyte ratio, AST: Aspartate aminotransferase, ALT: Alanine Aminotransferase, ICT: Iron chelator, SD: Standard deviation, bold value indicates significant p-value

**Supplementary Table 3: Laboratory differences based on smoking status**

| **Values** |  | **Mean** | **SD** | **Median** | **Range** | **P-value*** |
| --- | --- | --- | --- | --- | --- | --- |
| **TLC (×10³/µL )** | Smoker | 23.33 | 22.04 | 13.6 | 3.06-86.60 | 0.54 |
| Non-smoker | 23.70 | 28.40 | 15.3 | 4.48-157.80 |
| **ANC (k/uL)** | Smoker | 6.52 | 4.19 | 5.49 | 0.005-21 | 0.78 |
| Non-smoker | 6.18 | 3.46 | 5.4 | 0.1-18.2 |
| **ALC (k/uL)** | Smoker | 16.71 | 28.20 | 7.22 | 1.25-169.30 | 0.62 |
| Non-smoker | 13.83 | 23.31 | 6.26 | 0.37-135.30 |
| **AMC (k/uL)** | Smoker | 1.17 | 1.27 | 0.74 | 0.054-6.87 | 0.42 |
| Non-smoker | 0.95 | 0.91 | 0.57 | 0.091-4.14 |
| **HB (g/dl)** | Smoker | 7.86 | 1.39 | 7.7 | 4.59-11.40 | 0.15 |
| Non-smoker | 7.43 | 1.69 | 7.5 | 3.53-12.70 |
| **MCV (fL)** | Smoker | 68.45 | 9.88 | 69.6 | 48-91.7 | 0.59 |
| Non-smoker | 69.71 | 11.27 | 69.5 | 45.7-100.3 |
| **MCH (pg)** | Smoker | 21.46 | 3.38 | 21.4 | 14.4-29.8 | 0.46 |
| Non-smoker | 21.86 | 4.30 | 22 | 11.78-32.60 |
| **MCHC (g/dL)** | Smoker | 31.43 | 2.92 | 31.6 | 24.6-39.7 | 0.85 |
| Non-smoker | 31.43 | 2.84 | 31.5 | 22.75-38.50 |
| **RDW (%)** | Smoker | 27.12 | 8.23 | 27 | 12.55-41.80 | 0.34 |
| Non-smoker | 25.63 | 7.42 | 23.58 | 14.4-46.1 |
| **PLT (k/uL)** | Smoker | 589.77 | 333.20 | 585 | 135-2126 | 0.29 |
| Non-smoker | 514.02 | 293.01 | 444 | 53.73-1350 |
| **MPV (fl)** | Smoker | 9.22 | 3.42 | 9.63 | 0.93-16.40 | 0.31 |
| Non-smoker | 8.51 | 3.62 | 9.27 | 0.54-20.26 |
| **LMR** | Smoker | 21.10 | 47.15 | 7.38 | 1.45-236.68 | 0.94 |
| Non-smoker | 15.88 | 28.68 | 7.63 | 0.86-172.53 |
| **NLR** | Smoker | 1.12 | 1.06 | 0.97 | 0.001-4.65 | 0.57 |
| Non-smoker | 1.39 | 2.39 | 1 | 0.007-18.06 |
| **AST (U/L)** | Smoker | 63.25 | 40.72 | 55 | 14-218 | 0.18 |
| Non-smoker | 53.83 | 37.22 | 43 | 16-249 |
| **ALT (U/L)** | Smoker | 47.38 | 32.30 | 36.5 | 10-139 | 0.16 |
| Non-smoker | 53.68 | 83.55 | 30.38 | 5.87-582 |
| **Bilirubin (mg/dl)** | Smoker | 2.98 | 1.81 | 2.98 | 1.70-4.26 | 0.94 |
| Non-smoker | 2.s47 | 1.26 | 2.4 | 0.60-6.07 |
| **Ferritin before ICT (ng/ml)** | Smoker | 2532.57 | 1934.35 | 1987 | 10.85-8108 | 0.4 |
| Non-smoker | 2684.71 | 1688.56 | 2000 | 291.5-7371 |
| **Ferritin 3-6m after ICT (ng/ml)** | Smoker | 2323.65 | 1610.78 | 2000 | 291-6811 | 0.36 |
| Non-smoker | 1881.37 | 1266.89 | 1640 | 116.65-4000 |
| **Ferritin after 1 yr of ICT (ng/ml)** | Smoker | 2384.32 | 1413.30 | 2000 | 448.6-4000 | 0.68 |
| Non-smoker | 2261.67 | 1470.59 | 1826.5 | 132-5667 |

*TLC: Total leucocytic count, ANC: Absolute neutrophilic count, ALC: Absolute lymphocytic count, AMC: Absolute monocytic count, HB: Hemoglobin, MCV; Mean corpuscular volume, MCH; Mean corpuscular hemoglobin, MCHC: Mean corpuscular hemoglobin concentration, RDW: Red cell distribution width, PLT: platelets, MPV; Mean platelet volume, LMR: Lymphocyte-to-Monocyte Ratio, NLR: Neutrophil-to-lymphocyte ratio, AST: Aspartate aminotransferase, ALT: Alanine Aminotransferase, ICT: Iron chelator, SD: Standard deviations
